# Supplementary material for: Evaluation der Lernplattform TF-KVT Web für psychotherapeutisch Tätige
Source: Springer Nature journal article supplement (doi:10.1007/s00278-023-00688-0), 2023-10-05
Supplement: MOESM1 [file 26130886]

## e-supplement

### Evaluation der Lernplattform TF-KVT Web für psychotherapeutisch Tätige: Ein Onlinetraining zur evidenzbasierten Behandlung von PTBS bei Kindern und Jugendlichen

**Tabelle S1**

*Module des deutschsprachigen TF-KVT Web*

| <b>Name der TF-KVT Web Module</b> |                                                       |
|-----------------------------------|-------------------------------------------------------|
| 1                                 | Grundlagen                                            |
| 2                                 | Diagnostik                                            |
| 3                                 | Psychoedukation                                       |
| 4                                 | Elternfertigkeiten                                    |
| 5                                 | Entspannung                                           |
| 6                                 | Ausdruck und Modulation von Affekten                  |
| 7                                 | Kognitive Verarbeitung                                |
| 8                                 | Das Traumanarrativ                                    |
| 9                                 | Kognitives Bewältigen                                 |
| 10                                | In-Vivo-Bewältigung                                   |
| 11                                | Gemeinsame Sitzungen                                  |
| 12                                | Verbesserung von künftiger Sicherheit und Entwicklung |

**Tabelle S2**

Nutzercharakteristika von psychotherapeutisch tätigen Personen auf TF-KVT Web

|                                      | <b>Gesamt<br/>N = 2.564</b> | <b>Completer<br/>n = 981</b> | <b>Non-Completer<br/>n = 1.583</b> |
|--------------------------------------|-----------------------------|------------------------------|------------------------------------|
| <b>Herkunftsland, n</b>              |                             |                              |                                    |
| Deutschland                          | 2.475 (97%)                 | 950 (67%)                    | 1.525 (96%)                        |
| Schweiz                              | 65 (3%)                     | 24 (2%)                      | 41 (3%)                            |
| Österreich                           | 16 (1%)                     | 5 (1%)                       | 11 (1%)                            |
| Luxemburg                            | 3 (<1%)                     | 0 (0%)                       | 3 (1%)                             |
| Frankreich                           | 1 (<1%)                     | 1 (<1%)                      | 0 (0%)                             |
| Gambia                               | 1 (<1%)                     | 1 (<1%)                      | 0 (0%)                             |
| Griechenland                         | 1 (<1%)                     | 0 (0%)                       | 1 (<1%)                            |
| Liechtenstein                        | 1 (<1%)                     | 0 (0%)                       | 1 (<1%)                            |
| Südafrika                            | 1 (<1%)                     | 0 (0%)                       | 1 (<1%)                            |
| <b>Berufszweig, n</b>                |                             |                              |                                    |
| Psychologie                          | 1.774 (69%)                 | 652 (67.6%)                  | 1.122 (71%)                        |
| Psychiatrie                          | 597 (23%)                   | 238 (24%)                    | 359 (23%)                          |
| Soziale Arbeit                       | 156 (6%)                    | 71 (7%)                      | 85 (5%)                            |
| Beratung                             | 24 (1%)                     | 9 (1%)                       | 15 (1%)                            |
| Seelsorge                            | 13 (1%)                     | 10 (1%)                      | 3 (<1%)                            |
| <b>Höchster Bildungsabschluss, n</b> |                             |                              |                                    |
| Diplom                               | 872 (34%)                   | 307 (31%)                    | 565 (36%)                          |
| Master                               | 865 (34%)                   | 397 (41%)                    | 468 (30%)                          |
| Staatsexamen                         | 224 (9%)                    | 83 (9%)                      | 141 (9%)                           |
| Dissertation                         | 203 (8%)                    | 72 (7%)                      | 131 (8%)                           |
| Habilitation                         | 16 (1%)                     | 5 (1%)                       | 11 (1%)                            |
| Sonstige                             | 43 (2%)                     | 20 (2%)                      | 23 (2%)                            |
| Keine Angabe                         | 341 (13%)                   | 97 (10%)                     | 244 (15%)                          |
| <b>Berufliche Qualifikation, n</b>   |                             |                              |                                    |
| Approbation                          | 1.639 (64%)                 | 578 (59%)                    | 1.061 (67%)                        |
| In Ausbildung                        | 925 (36%)                   | 403 (41%)                    | 522 (33%)                          |
| <b>Berufserfahrung, n</b>            |                             |                              |                                    |
| < 5 Jahre                            | 1.589 (62%)                 | 649 (66%)                    | 940 (59%)                          |
| 5 - 10 Jahre                         | 528 (21%)                   | 179 (18%)                    | 349 (22%)                          |
| 10 - 20 Jahre                        | 320 (13%)                   | 110 (11%)                    | 210 (13%)                          |
| > 20 Jahre                           | 127 (5%)                    | 43 (4%)                      | 84 (5%)                            |

Erläuterung: \* =  $p < .005$ , \*\* =  $p < .001$

**Tabelle S3**

## Wissenszuwachs in den einzelnen Schulungsmodulen

| Modul                                      | Pretest<br>t<br>M (SD) | Posttest<br>M (SD) | Wissens-<br>zuwachs<br>(%) | Gruppenvergleich |                   |      |
|--------------------------------------------|------------------------|--------------------|----------------------------|------------------|-------------------|------|
|                                            |                        |                    |                            | n                | t(df)             | d    |
| Grundlagen                                 | 1.82<br>(.92)          | 3.08<br>(.76)      | 31                         | 1745             | t(1744) = 48.42** | 1.16 |
| Diagnostik                                 | 2.79<br>(.78)          | 3.17<br>(.78)      | 9                          | 1465             | t(1464) = 16.45** | .43  |
| Psychoedukation                            | 2.94<br>(.80)          | 3.15<br>(.76)      | 5                          | 1321             | t(1320) = 10.35** | .28  |
| Elternfertigkeiten                         | 2.78<br>(1.01)         | 3.17<br>(.79)      | 10                         | 1225             | t(1224) = 14.04** | .40  |
| Entspannung                                | 3.26<br>(.79)          | 3.75<br>(.55)      | 12                         | 1192             | t(1191) = 22.37** | .65  |
| Ausdruck und<br>Modulation von<br>Affekten | 3.06<br>(.86)          | 3.36<br>(.75)      | 8                          | 1151             | t(1150) = 11.70** | .34  |
| Kognitive Verarbeitung                     | 3.28<br>(.75)          | 3.40<br>(.67)      | 3                          | 1114             | t(1113) = 5.85**  | .18  |
| Das Traumanarrativ                         | 2.13<br>(1.05)         | 3.13<br>(.96)      | 25                         | 1069             | t(1068) = 29.54** | .90  |
| Kognitives Bewältigen                      | 2.27<br>(.87)          | 2.78<br>(.68)      | 13                         | 1024             | t(1023) = 18.79** | .59  |
| In-Vivo-Bewältigung                        | 2.20<br>(.71)          | 2.82<br>(.76)      | 16                         | 994              | t(993) = 22.43**  | .71  |
| Gemeinsame Sitzungen                       | 3.28<br>(.86)          | 3.69<br>(.59)      | 10                         | 980              | t(979) = 16.71**  | .53  |
| Künftige Sicherheit und<br>Entwicklung     | 2.83<br>(1.00)         | 3.69<br>(.59)      | 22                         | 951              | t(950) = 25.96**  | .84  |

Anmerkung: \* = p < .005, \*\* = p < .001 nach Bonferroni-Holm-Korrektur
